# Supplementary material for: Metal-responsive reversible binding of triplex-forming oligonucleotides with 5-hydroxyuracil nucleobases
Source: Royal Society of Chemistry journal article supplement (doi:10.1039/d1cc00553g), 2021-01-01
Supplement: d1cc00553g1.pdf [file d1cc00553g1.pdf]

# **Metal-responsive Reversible Binding of Triplex-forming Oligonucleotides with 5-Hydroxyuracil Nucleobases**

Kotaro Nishiyama, Keita Mori, Yusuke Takezawa and Mitsuhiko Shionoya\*

*Department of Chemistry, Graduate School of Science, The University of Tokyo 7-3-1 Hongo,  
Bunkyo-ku, Tokyo 113-0033 (Japan)*

*E-mail: shionoya@chem.s.u-tokyo.ac.jp*

## **Contents**

|                                 |                |
|---------------------------------|----------------|
| <b>1. Materials and methods</b> | <b>.....S2</b> |
| <b>2. Supplementary figures</b> | <b>.....S4</b> |
| <b>3. Supplementary tables</b>  | <b>.....S8</b> |
| <b>4. References</b>            | <b>.....S8</b> |

## 1. Materials and methods

### DNA synthesis

DNA oligonucleotides containing 5-hydroxyuracil ( $\text{U}^{\text{OH}}$ ) and 5-methylcytosine nucleobases were prepared according to the reported procedure.<sup>1-3</sup> DNA strands were synthesised on an NTS M-2-MX DNA/RNA synthesiser (Nihon Techno Service) using ultramild phosphoramidites and reagents (Glen Research). The products were deprotected using 28%  $\text{NH}_3$  aqueous solution at room temperature for 2–3 h and then purified and detritylated using a PolyPak II cartridge (Glen Research), followed by further purification by reverse-phase HPLC (Waters XBridge C18 column, buffers: A = MeCN, B = 0.1 M TEAA (pH 7.0) + 2% MeCN, flow rate: 0.5 mL  $\text{min}^{-1}$ , temperature: 60 °C). Unmodified oligonucleotides purified by HPLC were purchased from Japan Bio Services. The concentration of the oligomers was determined based on the UV absorbance at 260 nm.<sup>1</sup> The synthesised DNA strands were identified by ESI-TOF mass spectrometry.

#### T-TFO.

HPLC retention time: 9.5 min (gradient: 7%A (0 min), 9%A (30 min)). ESI-MS:  $m/z$  cacl'd for  $[\text{C}_{210}\text{H}_{280}\text{N}_{48}\text{O}_{139}\text{P}_{20} - 10\text{H}]^{10-}$ : 630.9; found: 630.9.  $\epsilon_{260} = 1.54 \times 10^5 \text{ M}^{-1} \text{ cm}^{-1}$ .

#### $\text{U}^{\text{OH}}$ -TFO-1.

HPLC retention time: 34.8 min (gradient: 5%A (0 min), 9.5%A (45 min)). ESI-MS:  $m/z$  cacl'd for  $[\text{C}_{209}\text{H}_{278}\text{N}_{48}\text{O}_{140}\text{P}_{20} - 9\text{H}]^{9-}$ : 701.3; found: 701.3.  $\epsilon_{260} = 1.50 \times 10^5 \text{ M}^{-1} \text{ cm}^{-1}$ .

#### $\text{U}^{\text{OH}}$ -TFO-2.

HPLC retention time: 23.1 min (gradient: 5%A (0 min), 8%A (30 min)). ESI-MS:  $m/z$  cacl'd for  $[\text{C}_{207}\text{H}_{274}\text{N}_{48}\text{O}_{142}\text{P}_{20} - 11\text{H}]^{11-}$ : 574.0; found: 574.0.  $\epsilon_{260} = 1.42 \times 10^5 \text{ M}^{-1} \text{ cm}^{-1}$ .

#### $\text{U}^{\text{OH}}$ -TFO-3.

HPLC retention time: 22.2 min (gradient: 5%A (0 min), 8%A (30 min)). ESI-MS:  $m/z$  cacl'd for  $[\text{C}_{207}\text{H}_{274}\text{N}_{48}\text{O}_{142}\text{P}_{20} - 10\text{H}]^{10-}$ : 631.5; found: 631.5.  $\epsilon_{260} = 1.42 \times 10^5 \text{ M}^{-1} \text{ cm}^{-1}$ .

### Melting experiments

DNA triplexes were prepared by mixing **dsDNA** (1.5  $\mu\text{M}$ ) and a TFO (1.5  $\mu\text{M}$ ) in 10 mM HEPES-NaOH buffer (pH 7.0) containing 140 mM NaCl and 10 mM  $\text{MgCl}_2$ . After adding  $\text{GdCl}_3 \cdot 6\text{H}_2\text{O}$  (Soekawa), the samples were annealed from 85 °C to 15 °C at the rate of  $-1.0$  °C/min.

Absorbance at 260 nm was recorded on a UV-1700 spectrophotometer (Shimadzu) equipped with a TMSPC-8 temperature controller while the temperature was raised from 15 °C to 85 °C at

the rate of 0.2 °C/min. A drop of mineral oil was laid on the sample to prevent evaporation. Normalised absorbance shown in the Figures were calculated as follows:

$$\text{Normalised } A_{260} = \{A_{260}(t \text{ } ^\circ\text{C}) - A_{260}(15 \text{ } ^\circ\text{C})\} / \{A_{260}(85 \text{ } ^\circ\text{C}) - A_{260}(15 \text{ } ^\circ\text{C})\} \times 100.$$

The melting temperatures ( $T_m$ ) were determined as an inflection point of a melting curve using a  $T_m$  analysis software LabSolutions (Shimadzu) with a 17-point adaptive smoothing program.

### **Native polyacrylamide gel electrophoresis (PAGE)**

**General.** DNA triplexes were prepared with **dsDNA** labelled with 6-carboxyfluorescein (FAM) at the 5'-terminal of the purine-rich strand. The polyacrylamide gels (18%) were prepared using 50 mM HEPES-NaOH buffer (pH 7.0) containing 20 mM MgCl<sub>2</sub>. The samples were mixed with 6× loading buffer (30% ethylene glycol, bromophenol blue) on ice and applied on the gel. After running at 80 V for 2 h in a cool incubator (4 or 15 °C), the gels were observed using Gel Doc EZ Imager (Bio-Rad). The bands were detected by FAM fluorescence and analysed by using Image Lab software (Bio-Rad). The yield of each product was calculated by comparing the band intensities of the triplex with that of the duplex. Averages of at least three runs are shown.

**Metal titration.** DNA triplexes were prepared by mixing **dsDNA** (1.5 μM) and a TFO (2.0 μM) in 10 mM HEPES-NaOH buffer (pH 7.0) containing 140 mM NaCl and 10 mM MgCl<sub>2</sub>, and then varying amounts of GdCl<sub>3</sub>·6H<sub>2</sub>O were added. After annealing (85 °C to 15 °C, -1.0 °C/min), the samples were subjected to the native PAGE analysis (Figs. 3, S3 and S6).

**Time-course analysis.** DNA triplexes were prepared by mixing **dsDNA** (1.5 μM) and **U<sup>OH</sup>-TFO-3** (2.0 μM) in 10 mM HEPES-NaOH buffer (pH 7.0) containing 140 mM NaCl and 10 mM MgCl<sub>2</sub>. After annealing in the absence (for Fig. S7a) or in the presence of 6 equiv. of GdCl<sub>3</sub> (for Fig. S7b) (85 °C to 15 °C, -1.0 °C/min), GdCl<sub>3</sub> (6 equiv.) or EDTA (6 equiv.) was added, respectively, and the mixtures were incubated at 20 °C. The (de)hybridisation of the triplexes was analysed by native PAGE run in a 15 °C chamber to maintain the gel temperature of ca. 20 °C.

**Gd<sup>III</sup>-responsive reversible binding of U<sup>OH</sup>-TFO-3 to the target duplex.** The target duplex (**dsDNA**, 1.5 μM) was annealed (85 °C to 15 °C, -1.0 °C/min) in 10 mM HEPES-NaOH buffer (pH 7.0) containing 140 mM NaCl and 10 mM MgCl<sub>2</sub>. At time = 0, **U<sup>OH</sup>-TFO-3** (2 μM) was added and the mixture was incubated at 20 °C. GdCl<sub>3</sub> (6 equiv.) and EDTA (6 equiv.) were alternately added in every one hour. The binding and release of the TFO were analysed by native PAGE which was run in a 15 °C chamber to maintain the gel temperature of ca. 20 °C (Fig. 4).

### **UV absorption spectroscopy**

DNA triplexes in the absence and presence of Gd<sup>III</sup> were prepared as described above. UV spectra were recorded at 20 °C on a Hitachi U-3500 spectrophotometer with a path length of 1.0 cm (Fig. S5).

## 2. Supplementary figures

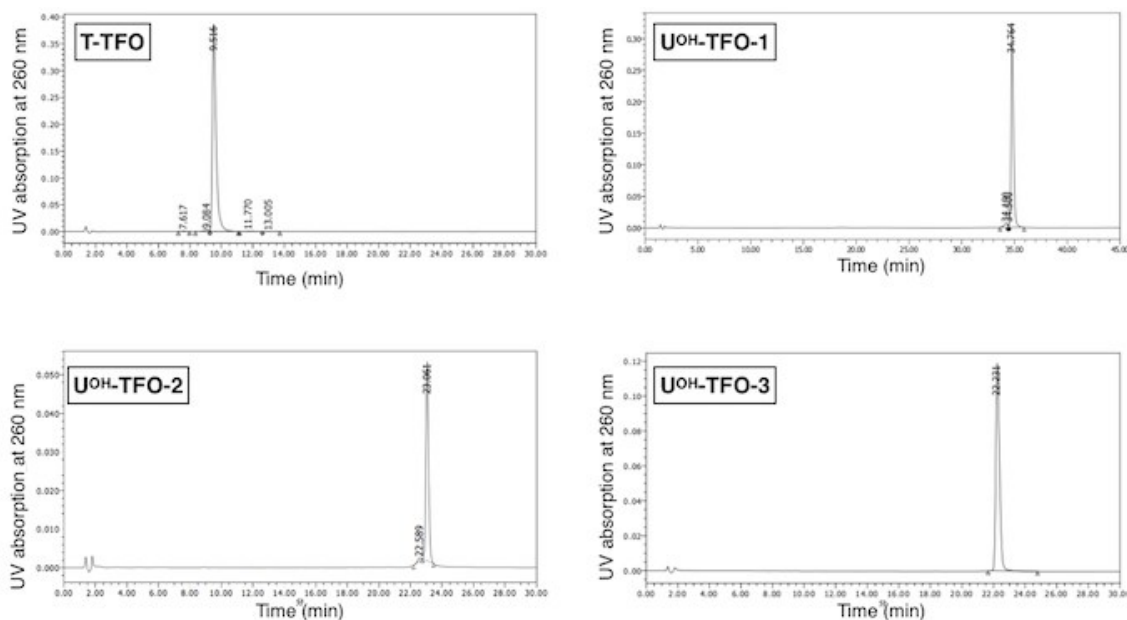

**Fig. S1** HPLC profiles of the synthesised oligonucleotides. Waters XBridge C18 column, buffers: A = MeCN, B = 0.1 M TEAA (pH 7.0) + 2% MeCN, flow rate: 0.5 mL/min, temperature: 60 °C.

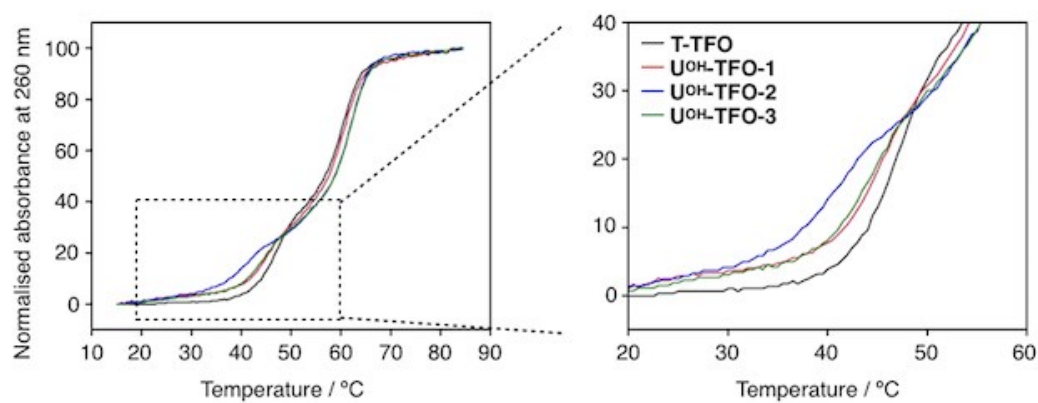

**Fig. S2** Melting curves of DNA triplexes consisting of U<sup>OH</sup>-containing TFOs and the target duplex (dsDNA). [dsDNA] = [TFO] = 1.5 μM in 10 mM HEPES-NaOH buffer (pH 7.0), 140 mM NaCl, 10 mM MgCl<sub>2</sub>, 0.2 °C/min.

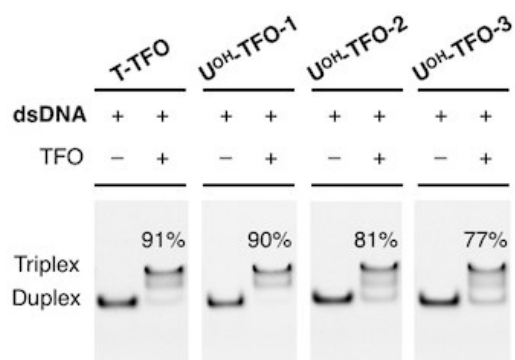

**Fig. S3** Native PAGE analyses of the mixtures of U<sup>OH</sup>-containing TFOs and the target duplex (dsDNA). [dsDNA] = 1.5  $\mu$ M, [TFO] = 0, 2.0  $\mu$ M in 10 mM HEPES-NaOH buffer (pH 7.0), 140 mM NaCl, 10 mM MgCl<sub>2</sub>. 18% Gel, 50 mM HEPES buffer (pH 7.0), 20 mM MgCl<sub>2</sub>, at 4  $^{\circ}$ C. FAM detection.

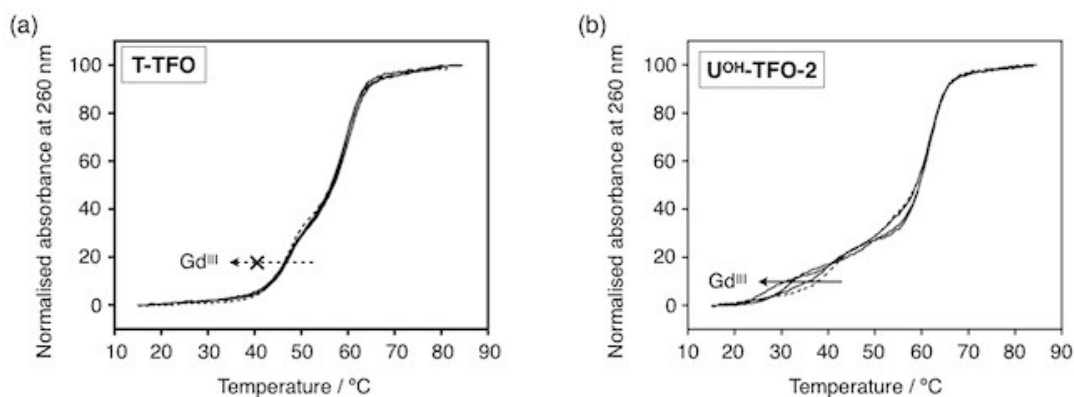

**Fig. S4** Melting curves of DNA triplexes consisting of (a) T-TFO and (b) U<sup>OH</sup>-TFO-2 in the absence or presence of Gd<sup>III</sup> ions. [dsDNA] = [TFO] = 1.5  $\mu$ M, [GdCl<sub>3</sub>]/[TFO] = 0, 1, 3 or 6 in 10 mM HEPES-NaOH buffer (pH 7.0), 140 mM NaCl, 10 mM MgCl<sub>2</sub>, 0.2  $^{\circ}$ C/min.

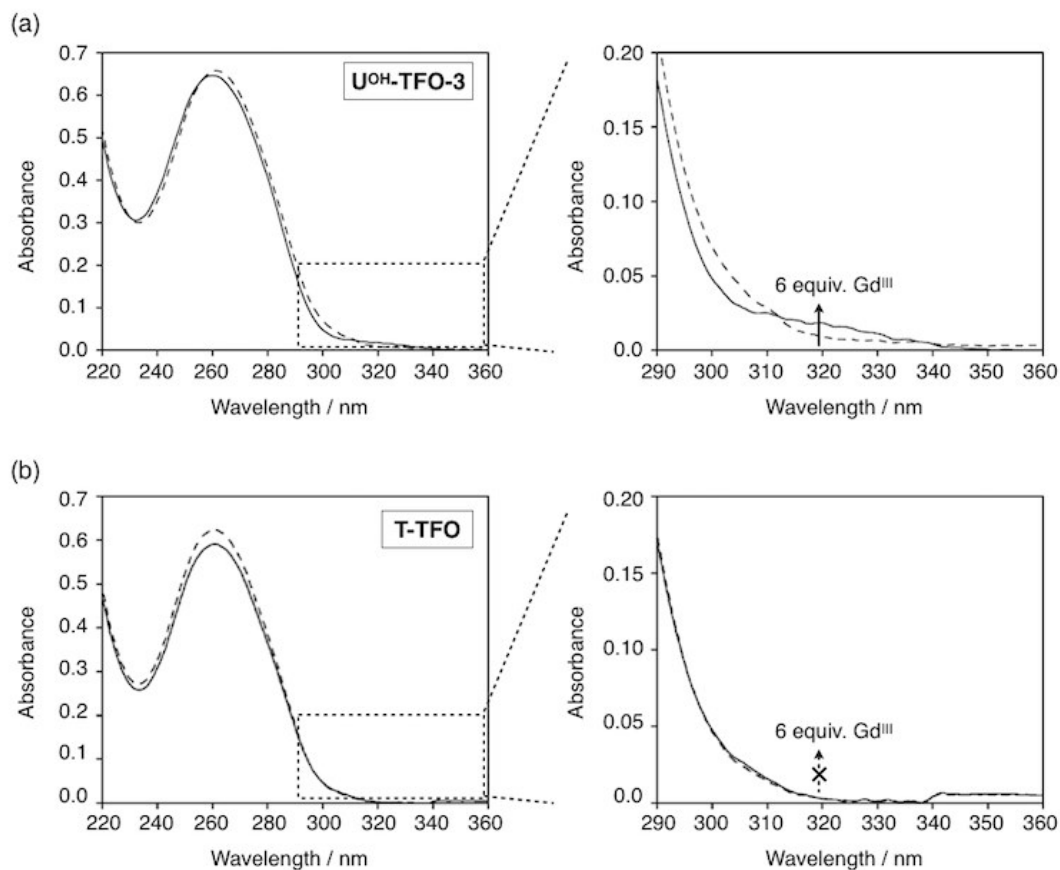

**Fig. S5** UV absorption spectra of a DNA triplex consisting of (a) **U<sup>OH</sup>-TFO-3** or (b) **T-TFO** in the absence or presence of Gd<sup>III</sup> ions. [dsDNA] = [TFO] = 1.5  $\mu$ M, [GdCl<sub>3</sub>]/[TFO] = 0, 6 in 10 mM HEPES-NaOH buffer (pH 7.0), 140 mM NaCl, 10 mM MgCl<sub>2</sub>.  $l$  = 1.0 cm, at 20  $^{\circ}$ C.

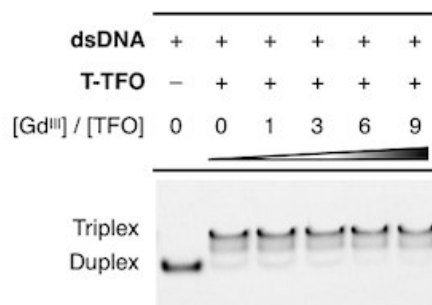

**Fig. S6** Native PAGE analysis of the DNA triplex consisting of **T-TFO** in the presence of Gd<sup>III</sup> ions [dsDNA] = 1.5  $\mu$ M, [T-TFO] = 0, 2.0  $\mu$ M, [GdCl<sub>3</sub>]/[T-TFO] = 0, 1, 3, 6 or 9 in 10 mM HEPES-NaOH buffer (pH 7.0), 140 mM NaCl, 10 mM MgCl<sub>2</sub>. 18% Gel, 50 mM HEPES buffer

(pH 7.0), 20 mM MgCl<sub>2</sub>, at 4 °C. FAM detection.

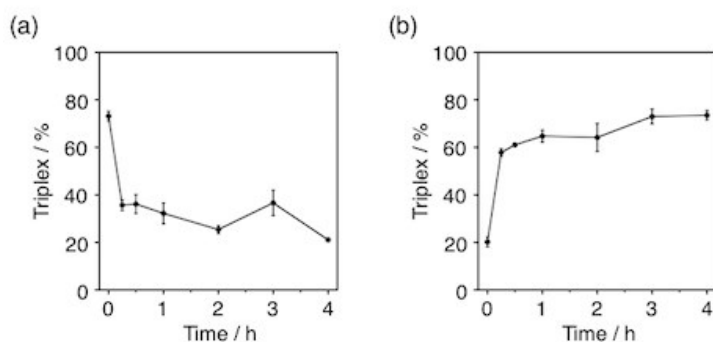

**Fig. S7** Time-course analyses of Gd<sup>III</sup>-dependent dissociation and association of DNA triplexes consisting of U<sup>OH</sup>-TFO-3. (a) Dissociation of the triplex triggered by the addition of Gd<sup>III</sup>. (b) Triplex formation triggered by the removal of Gd<sup>III</sup> using EDTA. [dsDNA] = 1.5 μM, [U<sup>OH</sup>-TFO-3] = 2.0 μM, [GdCl<sub>3</sub>] = 12 μM, [EDTA] = 0, 12 μM in 10 mM HEPES-NaOH buffer (pH 7.0), 140 mM NaCl, 10 mM MgCl<sub>2</sub>. The yields were determined by native PAGE analyses. Error bars indicate the standard errors.

### 3. Supplementary tables

**Table S1.** Melting temperatures of the DNA triplexes consisting of U<sup>OH</sup>-containing TFOs in the absence and presence of Gd<sup>III</sup> ions<sup>[a]</sup>.

|                                     | Melting transition | Gd <sup>III</sup> -free |                        |                                     | 6 eq. of Gd <sup>III</sup> |  |
|-------------------------------------|--------------------|-------------------------|------------------------|-------------------------------------|----------------------------|--|
|                                     |                    | $T_m / ^\circ\text{C}$  | $T_m / ^\circ\text{C}$ | $\Delta T_m / ^\circ\text{C}^{[b]}$ |                            |  |
| <b>dsDNA + T-TFO</b>                | 1st ( $T_{m1}$ )   | 48.3 ± 0.9              | 47.6 ± 0.5             | -0.8 ± 1.1                          |                            |  |
|                                     | 2nd ( $T_{m2}$ )   | 61.6 ± 0.6              | 60.7 ± 0.4             | -0.8 ± 0.7                          |                            |  |
| <b>dsDNA + U<sup>OH</sup>-TFO-1</b> | 1st ( $T_{m1}$ )   | 45.6 ± 0.1              | 41.3 ± 0.1             | -4.3 ± 0.1                          |                            |  |
|                                     | 2nd ( $T_{m2}$ )   | 60.9 ± 0.1              | 59.8 ± 0.2             | -1.1 ± 0.2                          |                            |  |
| <b>dsDNA + U<sup>OH</sup>-TFO-2</b> | 1st ( $T_{m1}$ )   | 41.8 ± 0.6              | 26.2 ± 0.7             | -15.6 ± 0.9                         |                            |  |
|                                     | 2nd ( $T_{m2}$ )   | 61.9 ± 0.5              | 61.1 ± 0.2             | -0.8 ± 0.5                          |                            |  |
| <b>dsDNA + U<sup>OH</sup>-TFO-3</b> | 1st ( $T_{m1}$ )   | 45.2 ± 0.0              | 29.7 ± 1.1             | -15.6 ± 1.1                         |                            |  |
|                                     | 2nd ( $T_{m2}$ )   | 62.0 ± 0.2              | 62.3 ± 0.4             | +0.3 ± 0.5                          |                            |  |

[a] Average  $T_m$  values of at least 3 runs are listed. Standard errors are also shown. [b]  $\Delta T_m$  represents the difference in the  $T_m$  values relative to that of the Gd<sup>III</sup>-free DNA triplexes.

### 4. References

1. Y. Takezawa, K. Nishiyama, T. Mashima, M. Katahira and M. Shionoya, *Chem. – Eur. J.*, 2015, **21**, 14713–14716.
2. J. Fujimoto, L. Tran and L. C. Sowers, *Chem. Res. Toxicol.*, 1997, **10**, 1254–1258.
3. M. L. Morningstar, D. A. Kreutzer and J. M. Essigmann, *Chem. Res. Toxicol.*, 1997, **10**, 1345–1350.
